1 **Epigenetic Changes in *Saccharomyces cerevisiae* Alters the Aromatic**  
2 **Profile in Alcoholic Fermentation**

3

4 Yanzhuo Kong<sup>1</sup>, Kenneth J. Olejar<sup>2</sup>, Stephen L.W. On<sup>1</sup>, Christopher Winefield<sup>1</sup>, Philip  
5 A. Wescombe<sup>3,4</sup>, Charles S. Brennan<sup>5</sup>, Richard N. Hider<sup>1</sup> and Venkata Chelikani<sup>1\*</sup>

6

7 <sup>1</sup>Faculty of Agriculture and Life Sciences, Lincoln University, Lincoln 7647, New  
8 Zealand;

9 <sup>2</sup>Chemistry Department, Colorado State University—Pueblo, Pueblo, CO 81001, USA;

10 <sup>3</sup>Yili Innovation Centre Oceania, Lincoln University, Lincoln 7647, New Zealand;

11 <sup>4</sup>National Center of Technology Innovation for Dairy, Hohhot, Inner Mongolia, China;

12 <sup>5</sup>School of Sciences, RMIT University, Melbourne, Australia.

13

14 **Email addresses:** [Yanzhuo.Kong@lincolnuni.ac.nz](mailto:Yanzhuo.Kong@lincolnuni.ac.nz); [Kenneth.Olejar@csupueblo.edu](mailto:Kenneth.Olejar@csupueblo.edu);

15 [Stephen.On@lincoln.ac.nz](mailto:Stephen.On@lincoln.ac.nz); [Christopher.Winefield@lincoln.ac.nz](mailto:Christopher.Winefield@lincoln.ac.nz);

16 [philip.wescombe@oceaniadairy.co.nz](mailto:philip.wescombe@oceaniadairy.co.nz); [charles.brennan@rmit.edu.au](mailto:charles.brennan@rmit.edu.au);

17 [Richard.Hider@lincoln.ac.nz](mailto:Richard.Hider@lincoln.ac.nz); [Venkata.Chelikani@lincoln.ac.nz](mailto:Venkata.Chelikani@lincoln.ac.nz)

18

19 **\*Correspondence:** Venkata Chelikani;

20 **Tel:** +64 3 423 0623; **Email:** [Venkata.Chelikani@lincoln.ac.nz](mailto:Venkata.Chelikani@lincoln.ac.nz)

21 **Postal address:**

22 PO Box 85084, Lincoln University, Lincoln 7647, Christchurch, New Zealand

23 **Abstract**

24 Epigenetic changes in genomics provide phenotypic modification without DNA  
25 sequence alteration. This study shows that benzoic acid, a common food additive  
26 and known histone deacetylase inhibitor (HDACi), has an epigenetic effect on  
27 *Saccharomyces cerevisiae*. Benzoic acid stimulated formation of epigenetic histone  
28 marks H3K4Me2, H3K27Me2, H3K18ac and H3Ser10p in *S. cerevisiae* and altered  
29 their phenotypic behavior, resulting in increased production of phenylethyl alcohol  
30 and ester compounds during alcoholic fermentation. Our study demonstrates the  
31 HDACi activity of certain dietary compounds such as sodium butyrate, curcumin and  
32 anacardic acid, suggests the potential use of these dietary compounds in altering *S.*  
33 *cerevisiae* phenotypes without altering host-cell DNA. This study highlights the  
34 potential to use common dietary compounds to exploit epigenetic modifications for  
35 various fermentation and biotechnology applications as an alternative to genetic  
36 modification. These findings indicate that benzoic acid and other food additives may  
37 have potential epigenetic effects on human gut microbiota, in which several yeast  
38 species are involved.

39

40 **Importance**

41 This manuscript investigates and reports for the first time utilizing microbial  
42 epigenetics to alter the fermentation process of Pinot noir wines. We have  
43 experimentally demonstrated that certain dietary epigenetic compounds possess  
44 histone deacetylase (HDAC) inhibiting activity and can alter the wine characteristics  
45 by altering yeast gene expression. We have coined the term 'nutrifermantics' to

46 represent this newly proposed field of research, which provides insights on the effect  
47 of certain dietary compounds on microbial strains and their potential application in  
48 fermentation process. This technological approach is a novel way to manipulate  
49 microorganisms for innovative food and beverage production with quality attributes.

50

51 **Keywords:** Fermentation, Nutrifermentics, Benzoic Acid, Microbial Epigenetics and  
52 Biotechnology

53

## 54 **1. Introduction**

55 Epigenetics is the study of phenotypic changes in organisms, which  
56 predominantly result from alterations of nucleotides and histones instead of the  
57 deoxyribonucleic acid (DNA) sequence; therefore epigenetic modifications are  
58 considered a non-GMO approach (1, 2). Among them, DNA methylation and histone  
59 acetylation are the most common and well-studied epigenetic modifications, which  
60 are the processes of transferring a methyl group to adenine and cytosine, or adding  
61 an acetyl group to lysine residues at the N terminus of histone (3). Several dietary  
62 bioactive and phytochemicals that naturally occur in fruits and vegetables can act as  
63 epigenetic modifiers and potentially can alter the target organism (4). Epigenetic  
64 modifiers can be predominantly classified as DNA methyltransferase (DNMT), DNMT  
65 inhibitors, histone deacetylase (HDAC), HDAC inhibitors and histone acetyl (HAT) and  
66 HAT inhibitors (5, 6).

67 *S. cerevisiae* is a well-studied model system for epigenetic regulation. Since  
68 DNA methylation systems are absent, histone modifications are the primary form of

69 epigenetic regulation, making it a simple system for understanding the relationship  
70 between histone modifications and epigenetic states (7, 8). Recently, the fission  
71 yeast, *Schizosaccharomyces pombe* was subjected to higher thresholds of caffeine,  
72 resulting in epigenetic changes producing transient epimutants with phenotypic  
73 plasticity including tolerance to caffeine and cross-resistance to antifungal agents,  
74 which was closely related to heterochromatin alterations and heterochromatin-  
75 mediated gene silencing (9).

76 Benzoic acid is a lipophilic weak acid that occurs naturally in many fruits,  
77 vegetables, nuts, and even in cultured dairy products as a microbial metabolite (10).  
78 Benzoic acid and its derivatives are FDA approved food additives and known histone  
79 deacetylase inhibitors (HDACi) that have been shown to stimulate a recently  
80 discovered histone mark, lysine benzylation (11, 12). HDACi compounds play an  
81 important role in heterochromatin regulation and gene expression by affecting  
82 histone modifications (13).

83 Here, we investigated the possibility of developing *S. cerevisiae* strains with  
84 desirable characteristics for alcoholic fermentation by treating them with the  
85 epigenetic modifier, benzoic acid. Benzoic acid was selected due its known capacity  
86 to modify histone proteins, its cost-effectiveness and solubility in the aqueous  
87 system. We also demonstrate that genes responsible for aroma compounds were  
88 upregulated in epimutants compared to the original *S. cerevisiae* strain. The effect of  
89 benzoic acid on *S. cerevisiae* H3 histone marks, as benzoic acid is a known HDACi,  
90 was also investigated. The results showed that there is several other dietary

91 compounds that could be used to epigenetically alter microbial phenotypes to  
92 produce fermented products with desirable characteristics (14, 15).

93 Wine plays an important role among alcoholic drinks and therefore is  
94 representative as a model fermentation system. The wine industry is a competitive  
95 industry and developing novel wines is necessary to maintain a competitive  
96 advantage in the global market. (16). Compared to some existing approaches, such  
97 as grapevine breeding and isolation of wild yeast, epigenetic modification of wine  
98 yeast is time and cost effective.

99 Our study demonstrates the exciting possibility of using dietary epigenetic  
100 compounds to develop non-GMO microbial strains with desirable characteristics for  
101 fermented products and biotechnology applications.

102

## 103 **2. Materials and methods**

### 104 **2.1 *S. cerevisiae* starter preparation**

105 A commercial wine yeast *S. cerevisiae* EC-1118 was used as fermentation  
106 starters in this study. Three types of starters were involved and applied, including  
107 wild type (500 h growth in regular YPD broth, 20 h/sub-culture), epimutant 1 (500 h  
108 growth in YPD broth containing 10 mM benzoic acid, 20 h/sub-culture) and  
109 epimutant 2 (500 h growth in YPD broth containing 10 mM benzoic acid, followed by  
110 20 h growth in regular YPD broth w/o stress, 20 h/sub-culture). 0.5 mL of cultured  
111 broth was transferred for each subculture.

### 112 **2.2 Histone H3 modification multiplex assay**

113           The 21 histone H3 modification patterns of 5 mM benzoic acid treated *S.*  
114 *cerevisiae* compared to untreated wild type strain were measured using EpiQuik™  
115 Histone H3 modification multiplex assay kit (Colorimetric; EpiGentek, NY, USA)  
116 following manufacturer's instructions. Absorbance was measured using FLUOstar  
117 Omega microplate reader (BMG LABTECH, Ortenberg, Germany) at 450 nm with a  
118 reference wavelength of 655 nm.

### 119 **2.3 RNA purification and gene expression analysis**

120           *S. cerevisiae* under different treatments were harvested after 12 h growth to  
121 reach a sample size of  $1 \times 10^8$  cells for RNA purification. Total RNA from *S. cerevisiae*  
122 was isolated using RiboPure™ RNA Purification Kit (Invitrogen, MA, USA), following  
123 manufacturer's instructions. RNA purity was measured by DeNovix DS-11  
124 Spectrophotometer (DeNovix Inc., DE, USA). The RNA expression was measured  
125 using nCounter technology (NanoString Technologies, Inc., WA, USA). RNA samples  
126 were posted to The University of Auckland, where all the preparation and  
127 measurement were completed. Assay was carried out on 12 samples/24 genes  
128 (including 5 housekeeping genes), the RNA input amount was 300 ng for each  
129 sample. Expression counts were normalized and analyzed using the nSolver 4.0  
130 software (NanoString Technologies, Inc., WA, USA).

### 131 **2.4 DAPI staining**

132           *S. cerevisiae* strains were cultured overnight to an  $OD_{600} = 1.0 \pm 0.2$ , followed  
133 by being treated with 2 volumes of 100% Ethanol for 45 min at room temperature.  
134 The mixture was centrifuged at 2500 rpm for 1 min, 1 mL  $1 \times$  PBS was used to wash  
135 the cells, followed by another centrifugation at 2500 rpm for 1 min. The pellet was

136 resuspended in 200  $\mu$ L of 1  $\times$  PBS/1:2000 dilution DAPI mixture, and was observed  
137 under Nikon Eclipse 50i fluorescence microscope (Nikon, Tokyo, Japan) after 45 min.

## 138 **2.5 Yeast morphology**

139 *S. cerevisiae* starters were transferred from YPD broth onto corresponding  
140 YPD agar plates. Cultured media were serially diluted to  $OD_{600} = 0.1$ , 5  $\mu$ L strain  
141 solution was spotted onto corresponding YPD agar plates after an additional 10  
142 times dilution being applied, 1  $\times$  PBS was used for dilution. The growth temperature  
143 was set at 32  $^{\circ}$ C.

## 144 **2.6 GC-MS and chemical analysis of wine samples**

145 The alcohol and ester aroma compounds analysis was conducted using  
146 headspace-solid phase microextraction (HS-SPME) and Shimadzu QP-2010 GC-MS  
147 (Shimadzu, Kyoto, Japan). The methodology was adopted from previous published  
148 articles, with slight modification regarding the diluent and sample matrix used with  
149 the standards (17, 18). Detailly, 0.9 mL of sample was pipetted into a 20 mL amber  
150 SPME vial and diluted with 8.06 mL of 5 g/L tartaric acid buffer (pH 3.5), 40  $\mu$ L of  
151 composite internal standard was added followed by 4.5 g of sodium chloride before  
152 the vial was immediately capped.

153 For the preparation of the highest standard of the calibration curve, the  
154 composite standard was diluted in 136 mL sample matrix which was rotary  
155 evaporated at 36  $^{\circ}$ C for 40 min to remove volatile background, and reconstituted  
156 with 14.2% Ethanol as well as 40  $\mu$ L of 5 M sodium hydroxide which returned the pH  
157 back to 3.15. It was then serially diluted in the provided matrix to ensure each vial  
158 had a maximum volume of 0.9 mL of matrix present. Each vial was then diluted

159 further with 8.06 mL of tartaric acid buffer as in the samples with 40  $\mu$ L of composite  
160 internal standard being added, followed by 4.5g of sodium chloride before the vials  
161 were immediately capped.

162 Ethanol content was analyzed by GC-FID, which was carried out on a  
163 Shimadzu GC-2010 gas chromatograph-flame ionization detector equipped with an  
164 AOC-20i autoinjector and AOC-20s autosampler. The chromatography was  
165 performed using an 19091N-133 HP-Innowax GC column (Polyethylene Glycol -  
166 Agilent Technologies, CA, USA). Residual sugars including glucose and fructose were  
167 measured using Vintessential enzymatic test kit (Vintessential Laboratories –  
168 Tasmania, TAS, Australia), and glycerol content was measured using Megazyme  
169 glycerol assay kit (Megazyme, Wicklow, Ireland).

## 170 **2.7 HDAC inhibition assay**

171 The HDAC inhibition capacity of candidate epigenetic modifiers was  
172 measured by a fluorometric HDAC assay kit (Active Motif, Inc., CA, USA), following  
173 the manufacturer's instructions with slight modification to suit the objectives of this  
174 research. HeLa nuclear extract was used as the HDAC source, with an input volume  
175 of 5  $\mu$ L. Candidate epigenetic modifiers/HDAC inhibitors, including the positive  
176 control Trichostatin A (TSA), were added at the volume of 10  $\mu$ L. The volume of  
177 HDAC assay buffer was adjusted to reach a total volume of 50  $\mu$ L in each well.  
178 Fluorescence was measured using FLUOstar Omega microplate reader (BMG  
179 LABTECH, Ortenberg, Germany) with excitation wavelength at 360 nm and emission  
180 wavelength at 460 nm.

## 181 **2.8 Statistical analysis**



182 Results were gathered from three independent biological replicates unless  
183 otherwise stated. Data were analyzed using analysis of variance (ANOVA) with a  
184 generalized linear model, followed by *post-hoc* Tukey's mean comparison test, using  
185 Minitab 20 (Minitab, LLC, PA, USA). PCA and AHC were analyzed using XLSTAT  
186 Statistical Software 2016 (Addinsoft, Paris, France). A confidence level of 95% was  
187 applied to the statistical analysis and data are presented as mean  $\pm$  SD.

188

### 189 **3. Results and discussion**

#### 190 **3.1 Project scope: the practice of altering fermentation by epigenetics**

191 The schematic diagram put forward to fit the entire scope of the project is  
192 shown in Figure 1 and demonstrates the proposed innovation to food fermentation  
193 by impacting gene expression levels of microbial starters using diet-derived  
194 epigenetic modifiers. There are a range of diet-derived epigenetic modifiers  
195 including bioactive compounds and phytochemicals, which are of health benefits to  
196 humans. For example, diet derived short-chain fatty acids are a group of HDAC  
197 inhibitors which are known to play a key role in epithelial hemostasis and repair  
198 process (14). The research investigating the effect of food and food components on  
199 gene expression, and its role involved in the interaction between host/microbes and  
200 the nutritional environment is a well-established research field called  
201 "nutrigenomics" (Figure 1A). In this study, we have shown that we can use these  
202 dietary epigenetic compounds such as dietary HDACi to alter the microbial  
203 phenotypes used in the fermentation process. We coined the word  
204 "nutrifermentics" (Figure 1B) to represent this new field of research. These dietary

205 HDACi could also provide health benefits to consumers, in addition to improving  
206 starter microbial cultures in the fermentation process.

### 207 **3.2 Influence of benzoic acid on *S. cerevisiae* histone H3**

208 Benzoic acid and its derivatives are known HDACi (11) and recent study  
209 revealed that sodium benzoate can stimulate a new histone mark, lysine  
210 benzylation with significant physiological relevance (12). Figure 2A shows the  
211 percentage of relative changes in 21 distinct histone H3 modification patterns in *S.*  
212 *cerevisiae*, which was treated with 5 mM benzoic acid, in comparison with untreated  
213 wild type strain. Specific antibodies, including 15 for methylation, 4 for acetylation  
214 and 2 for phosphorylation were utilized to measure the 21 patterns. Most  
215 modification patterns between treated and untreated strains were around 100%  
216 when taking the variation into consideration. However, both stimulation and  
217 inhibition in histone marks were seen with exposure to 5 mM benzoic acid.  
218 H3K4me<sub>2</sub>, H3K9me<sub>3</sub>, H3K27me<sub>2</sub>, H3K9ac, H3K18ac and H3ser10p were stimulated  
219 more than four-fold in treated strains, whereas few methylation patterns including  
220 H3K4me<sub>3</sub>, H3K9me<sub>2</sub> and H3K27me<sub>3</sub> were about half compared to the untreated  
221 strain. Histone modifications are directly relevant to gene expression levels in the  
222 organism

### 223 **3.3 Gene expression analysis by NanoString**

224 NanoString transcription analysis revealed the expression of 24 genes  
225 including five housekeeping genes. Figure 3 shows the gene expression levels of *S.*  
226 *cerevisiae* under different treatments, TSA treatments including first-time exposure,  
227 500 h treatment (20 h/sub-culture) and 1 generation w/o treatment after 500 h

228 exposure were included as the HDACi controls, which were in accordance with  
229 benzoic acid treatments (first-time exposure to 5 mM benzoic acid, 500 h treatment  
230 (20 h/sub-culture) at 10mM benzoic acid /epimutant 1 and 1 generation w/o  
231 treatment after 500h exposure/epimutant 2). The untreated wild type strain was  
232 included as a negative control along with 0.9% sodium chloride and with a dietary  
233 polyphenol epigallocatechin gallate (EGCG) that has been reported to inhibit DNMTs  
234 (4).

235 Results are presented as a heat map graph after Z-score transformation,  
236 ranging from -3 to 3, blue (downregulation) to orange (upregulation), Figure 3. As  
237 shown in Figure 3, RNA samples with different treatments were clustered after data  
238 normalization, in which benzoic acid supplementation became a distinct influencing  
239 factor.

240 Genes responsible for overproducing phenylethyl alcohol (ARO4 and TYR1  
241 (19), fusel alcohol and ester synthesis (EEB1) (20), biosynthesis of higher alcohols  
242 (BAT1) (21) were all upregulated. There was no significant change in the expression  
243 levels of another ester synthase gene (EHT1) (20) between samples. Several genes  
244 responsible for stress tolerance and cell cycle were analyzed finding the histone  
245 deacetylase gene (RPD3) (22) expression was downregulated while the histone  
246 acetyltransferase gene (GCN5) (23) was upregulated in both 5mM benzoic acid-  
247 treated strain and epimutant 1, clearly supporting the role of benzoic acid as an  
248 HDACi. Kurat et al. (23), previously reported that upregulation of the GCN5  
249 expression led to histone acetylation and global transcriptional activation. The  
250 variation observed could potentially indicate alternative acetylation mechanisms in

251 *S. cerevisiae* resulted from different concentrations and exposure time of certain  
252 epigenetic compounds such as benzoic acid. With respect to the clusters, RNA from  
253 *S. cerevisiae* epimutant 1 (500 h growth in YPD broth containing 10 mM benzoic acid,  
254 20 h/sub-culture) showed quite similar expression patterns to 5 mM benzoic acid  
255 treatment (first time exposure). Moreover, the epimutant 2 (500 h growth in YPD  
256 broth containing 10 mM benzoic acid, followed by 20 h growth in regular YPD broth  
257 w/o stress, 20 h/sub-culture) exhibited significantly different RNA expression  
258 patterns compared with the benzoic acid treatment group. The epimutant 2 tended  
259 to be more relevant to wild type and other *S. cerevisiae* treatments. This observation  
260 suggests that the alteration of gene expression caused by dietary epigenetic  
261 compounds, which is revealed by direct counts of RNA transcripts, is transient and  
262 tends to ease out once the stress inducer is eliminated from the environment.

### 263 **3.4 Influence of benzoic acid on *S. cerevisiae* nucleus**

264 As shown in Figure 4A, DAPI (4', 6-diamidino-2-phenylindole) staining was  
265 applied to wild type and epimutant 1 to visualize their nuclei in terms of any size  
266 changes (expansion) that may have resulted from benzoic acid treatment. As DAPI  
267 stoichiometrically binds to DNA, which enables the detection and comparison of  
268 DNA content variation by fluorescence microscopy (24). The corrected total cell  
269 fluorescence (CTCF) was calculated based on the integrated density in the nucleus  
270 region. The mean comparison results indicate that there is a significant difference  
271 between two samples ( $p < 0.05$ ), which suggests an expansion to the nucleus region  
272 in *S. cerevisiae* when they are exposed to 10 mM benzoic acid. A. D. Walters et al.  
273 (25) suggested that the expansion of nuclear envelope in budding yeast is

274 independent from cell growth, but potentially related to nucleoplasmic factors, such  
275 as one or more nucleoplasmic proteins that are synthesized or imported into the  
276 nucleus. As HDAC and HDACi have been well researched being involved in multiple  
277 cell processes, such as cytokinesis and apoptosis (26, 27). Therefore benzoic acid  
278 induced, HDACi related modifications could have occurred in nucleoplasm, resulting  
279 in expanded nucleus or relaxed genome state, which led to more fluorescence in this  
280 study.

### 281 **3.5 Yeast morphology in relation to epigenetic alteration**

282 The cellular morphology of benzoic acid-treated *S. cerevisiae* was recorded to  
283 depict phenotypic differences compared to the wild type (Figure 4B). Epimutant 1  
284 was more tolerant to benzoic acid treatment and showed visible alteration in colony  
285 morphology. Observed tolerance and adaptation to benzoic acid faded soon after  
286 the stress was eliminated from the environment, demonstrating the transient nature  
287 of the treatment and possibly epigenetic change. The observation is supported by S.  
288 Torres-Garcia et al. (9); phenotypic plasticity can be promoted by epigenetic  
289 processes that let the wild type cells adapt to certain unfavorable environments  
290 without altering genetic information, although these alterations are generally  
291 unstable and will be gradually lost without the stress. This observation is in line with  
292 NanoString assay, where *S. cerevisiae* epimutant 1 showed very similar expression  
293 patterns to 5 mM benzoic acid-treated strain (first time exposure). However,  
294 epimutant 2 exhibited significantly different gene expression patterns when  
295 compared within the benzoic acid treatment group. Epimutant 2 gene expression  
296 patterns were more similar to wild type than other treatments. This suggests that

297 the alteration of gene expression caused by dietary epigenetic compounds is  
298 transient and tends to fade once the compound is eliminated from the environment.  
299 Overall, the robustness of *S. cerevisiae* epimutants and their adaption to stressed  
300 environment were improved by continuously treating the strain with the threshold  
301 levels of benzoic acid. However, epigenetic plasticity could be an issue in retaining  
302 the robust characteristics for future generations once the epigenetic modifiers is  
303 removed from the environment. However, commercial yeast starter culture  
304 producer could potentially prefer single/double use strains similar to commercial  
305 seed companies.

### 306 **3.6 Wine characteristics changes due to epigenetic alteration**

307 To test the impact of benzoic acid-stimulated epigenetic changes on  
308 fermentation characteristics of *S. cerevisiae*, treated cultures were used to ferment  
309 wine samples. Wines were fermented using three *S. cerevisiae* starters, including  
310 wild type, epimutant 1 (500 h growth in YPD broth containing 10 mM benzoic acid,  
311 20 h/sub-culture) and epimutant 2 (epimutant 1 followed by 20 h growth in regular  
312 YPD broth without stress). Principal component analysis (PCA) of aromatic attributes  
313 of wine samples and agglomerative hierarchical clustering (AHC) were utilized for  
314 classification of fermented wine samples (Figure 5A). In addition, GC-MS analysis was  
315 carried out on wine samples, distinct results are shown in Figure 5B, with full analysis  
316 of 18 compounds listed in Table 1. The three starters resulted in three wine  
317 categories, each with distinct aromatic profiles (Figure 5A & 5B). The positive  
318 correlation between epimutant 1 and *cis*-3-hexen-1-ol may indicate a kiwifruit and  
319 leaf-like aroma is potentially associated with wine produced by epimutant 1 (28).

320 Since *cis*-3-hexen-1-ol is an important aroma compound in many white wines, it  
321 might confer a complex aromatic profile on the altered wine, by adding partial  
322 aromatic features of white wine. As shown in Figure 5B, the content of five ester and  
323 higher alcohol compounds is listed as potential indication of wine aroma alterations  
324 resulting from epimutation of the starters. Wine fermented by epimutant 1  
325 possessed significantly increased phenylethyl alcohol (rose scent), ethyl lactate  
326 (butter aroma), *cis*-3-hexen-1-ol (leaf alcohol confers grassy-green odor) and ethyl  
327 pentanoate (fruity aroma), whereas the content of ethyl octanoate was reduced  
328 (soapy, floral aroma) ( $p < 0.05$ ) (29). This GC-MS analysis clearly supports the gene  
329 expression observed using Nanostring assay. This is a significant advancement in the  
330 fermentation field considering the treatments lead to over expression of genes  
331 associated with favorable aromas such as Phenyl ethyl alcohol and overproduction of  
332 these compounds are confirmed by GC-MS analysis. In addition to aroma alterations,  
333 major chemical composition changes due to epigenetic alterations were also  
334 investigated, including residual sugars (glucose and fructose), glycerol and ethanol  
335 (Supplementary Dataset 1). Generally, epimutant 1 tended to increase the fructose  
336 content in wine ( $p < 0.05$ ), whereas not significantly affect the content of other  
337 chemicals analyzed ( $p > 0.05$ ). The study detected a few more distinct aromatic  
338 compounds by qualitative GC-MS in these wine samples and is listed in  
339 Supplementary Dataset 2.

### 340 **3.7 HDAC inhibition capacity**

341 As in previous NanoString assay, significantly different patterns of transcribed  
342 genes by other treatments compared to benzoic acid group, suggesting that HDACi

343 and compounds capable of modifying epigenetic states have different effects on  
344 histone proteins and gene expression patterns, potentially indicating wide range of  
345 application for these HDACi (Figure 3). This led us to consider the HDACi activity of  
346 dietary epigenetic compounds. To investigate this we applied a well-established  
347 HDAC assay using HeLa cell lines (14, 15). The dietary compounds tested were  
348 sodium butyrate, quercetin, genistein, anacardic acid, curcumin and EGCG (Figure  
349 2B). Untreated HeLa nuclear extracts were used as the negative control. 5-Aza-2'-  
350 deoxycytidine, which is a well-recognised DNMT inhibitor but not HDAC inhibitor  
351 (30), and glucose were also included as negative controls for assay calibration. A  
352 well-known HDACi, namely TSA, was used as a generic inhibitor of histone  
353 acetylation to test the impact on gene transcription (31). Relevant half-maximal  
354 inhibitory concentrations ( $IC_{50}$ ) were referred for determining the testing  
355 concentrations of candidate chemicals, except for benzoic acid since an  $IC_{50}$  was not  
356 determined. In general, most of the tested dietary compounds exhibited equivalent  
357 or better HDACi capacity compared to TSA, the positive control, suggesting their  
358 potential application in the food industry, particularly the food fermentation field.

359

#### 360 **4. Conclusions**

361 This study showed the potential applications of dietary epigenetic  
362 compounds in food research. As a proof of concept, it has been shown that  
363 epigenetic changes in yeast *S. cerevisiae* can be induced using dietary compounds  
364 resulting in different aromatic profiles in alcoholic fermentation. This opens the  
365 exciting possibility of using a non-GMO approach to obtain microbial strains with



366 desirable characteristics for fermented food products. Interestingly, it was observed  
367 that the downregulation of H3K27me3 histone mark and upregulation of GCN4 gene,  
368 which are associated with life span extension in *C. elegans* and *S. cerevisiae*,  
369 respectively (32-34). Understanding the role of these dietary epigenetic compounds  
370 on cell ageing is potentially an interesting future research.

371

372 **Author Contributions:** **Yanzhuo Kong:** Investigation, Validation, Formal Analysis,  
373 Writing – Original Draft & Writing – Review & Editing; **Kenneth J. Olejar:**  
374 Investigation, Validation & Writing – Review & Editing; **Stephen L.W. On:** Validation  
375 & Writing – Review & Editing; **Christopher Winefield:** Validation & Writing – Review  
376 & Editing; **Philip A. Wescombe:** Validation & Writing – Review & Editing; **Charles S.**  
377 **Brennan:** Writing – Review & Editing; **Richard N. Hider:** Investigation & Validation;  
378 **Venkata Chelikani:** Conceptualization, Writing – Review & Editing, Resources,  
379 Supervision & Funding Acquisition.

380

381 **Declaration of competing interest:** The authors declare that they have no known  
382 competing financial interests or personal relationships that could have appeared to  
383 influence the work reported in this paper.

384

385 **Funding:** This work was supported by Lincoln University Startup grant (Grant  
386 INT4665) and KiwiNet Emerging Innovator award (Grant No: 46465)

387 **Acknowledgments:** The work described is in relation to Australian Provisional Patent  
388 Number: 2022901674. We thank Shibani Suresh for her contributions to the initial

389 part of the research, Jason Breitmeyer for his technical and experimental support  
390 towards GC-MS analysis, and Lincoln University Marketing and Customer  
391 Engagement Team for designing the schematic diagram.

392 **References**

- 393 1. Berger SL, Kouzarides T, Shiekhattar R, Shilatifard A. 2009. An operational  
394 definition of epigenetics. *Genes Dev* 23:781-783.
- 395 2. Morovic W, Budinoff CR. 2020. Epigenetics: A New Frontier in Probiotic  
396 Research. *Trends Microbiol* doi:10.1016/j.tim.2020.04.008.
- 397 3. Damodaran TV. 2011. Genotoxicities and Infertility, p 923-947, *Reproductive*  
398 *and Developmental Toxicology* doi:10.1016/B978-0-12-382032-7.10071-2.
- 399 4. Hardy TM, Tollefsbol TO. 2011. Epigenetic diet: Impact on the epigenome and  
400 cancer. *Epigenomics* 3:503-518.
- 401 5. Link A, Balaguer F, Goel A. 2010. Cancer chemoprevention by dietary  
402 polyphenols: Promising role for epigenetics. *Biochem Pharmacol* 80:1771-  
403 1792.
- 404 6. Malcomson FC, Mathers JC. 2017. Nutrition, epigenetics and health through  
405 life. *Nutr Bull* 42:254-265.
- 406 7. Zemach A, McDaniel IE, Silva P, Zilberman D. 2010. Genome-wide  
407 evolutionary analysis of eukaryotic DNA methylation. *Science* 328:916-919.
- 408 8. O’Kane CJ, Hyland EM. 2019. Yeast epigenetics: the inheritance of histone  
409 modification states. *Bioscience Reports* 39.
- 410 9. Torres-Garcia S, Yaseen I, Shukla M, Audergon PNCB, White SA, Pidoux AL,  
411 Allshire RC. 2020. Epigenetic gene silencing by heterochromatin primes  
412 fungal resistance. *Nature* 585:453-458.

- 413 10. Park SY, Yoo MY, Paik HD, Lim SD. 2017. Production of benzoic acid as a  
414 natural compound in fermented skim milk using commercial cheese starter. J  
415 Dairy Sci 100:4269-4275.
- 416 11. Anantharaju PG, Reddy BD, Padukudru MA, Kumari Chitturi CHM,  
417 Vimalambike MG, Madhunapantula SV. 2017. Naturally occurring benzoic  
418 acid derivatives retard cancer cell growth by inhibiting histone deacetylases  
419 (HDAC). Cancer Biology and Therapy 18:492-504.
- 420 12. Huang H, Zhang D, Wang Y, Perez-Neut M, Han Z, Zheng YG, Hao Q, Zhao Y.  
421 2018. Lysine benzoylation is a histone mark regulated by SIRT2. Nature  
422 communications 9:1-11.
- 423 13. Schnekenburger M, Diederich M. 2015. Nutritional epigenetic regulators in  
424 the field of cancer: new avenues for chemopreventive approaches, p 393-  
425 425, Epigenetic cancer therapy. Elsevier.
- 426 14. Wu SE, Hashimoto-Hill S, Woo V, Eshleman EM, Whitt J, Engleman L, Karns R,  
427 Denson LA, Haslam DB, Alenghat T. 2020. Microbiota-derived metabolite  
428 promotes HDAC3 activity in the gut. Nature doi:10.1038/s41586-020-2604-2.
- 429 15. Malcomson F, Mathers J. 2017. Nutrition, epigenetics and health through life.  
430 Nutrition Bulletin 42:254-265.
- 431 16. Anonymous. Wine Market Size, Share & Trends Analysis Report By Product  
432 (Table Wine, Dessert Wine, Sparkling Wine), By Distribution Channel (On-  
433 trade, Off-trade), By Region, And Segment Forecasts, 2021 - 2028.  
434 <https://www.grandviewresearch.com/industry-analysis/wine-market>.  
435 Accessed 03 Sep 2021.

- 436 17. Tomasino E, Harrison R, Breitmeyer J, Sedcole R, Sherlock R, Frost A. 2015.  
437 Aroma composition of 2-year-old New Zealand Pinot Noir wine and its  
438 relationship to sensory characteristics using canonical correlation analysis  
439 and addition/omission tests. *Australian Journal of Grape and Wine Research*  
440 21:376-388.
- 441 18. Green J, Parr W, Breitmeyer J, Valentin D, Sherlock R. 2011. Sensory and  
442 chemical characterisation of Sauvignon blanc wine: Influence of source of  
443 origin. *Food Res Int* 44:2788-2797.
- 444 19. Cordente AG, Solomon M, Schulkin A, Leigh Francis I, Barker A, Borneman AR,  
445 Curtin CD. 2018. Novel wine yeast with ARO4 and TYR1 mutations that  
446 overproduce 'floral' aroma compounds 2-phenylethanol and 2-phenylethyl  
447 acetate. *Appl Microbiol Biotechnol* 102:5977-5988.
- 448 20. Saerens SM, Verstrepen KJ, Van Laere SD, Voet AR, Van Dijck P, Delvaux FR,  
449 Thevelein JM. 2006. The *Saccharomyces cerevisiae* EHT1 and EEB1 genes  
450 encode novel enzymes with medium-chain fatty acid ethyl ester synthesis  
451 and hydrolysis capacity. *J Biol Chem* 281:4446-4456.
- 452 21. Lilly M, Bauer FF, Styger G, Lambrechts MG, Pretorius IS. 2006. The effect of  
453 increased branched-chain amino acid transaminase activity in yeast on the  
454 production of higher alcohols and on the flavour profiles of wine and  
455 distillates. *FEMS Yeast Res* 6:726-743.
- 456 22. Rundlett SE, Carmen AA, Kobayashi R, Bavykin S, Turner BM, Grunstein M.  
457 1996. HDA1 and RPD3 are members of distinct yeast histone deacetylase

- 458 complexes that regulate silencing and transcription. Proceedings of the  
459 National Academy of Sciences 93:14503-14508.
- 460 23. Kurat CF, Lambert J-P, Petschnigg J, Friesen H, Pawson T, Rosebrock A,  
461 Gingras A-C, Fillingham J, Andrews B. 2014. Cell cycle-regulated oscillator  
462 coordinates core histone gene transcription through histone acetylation.  
463 Proceedings of the National Academy of Sciences 111:14124-14129.
- 464 24. Ferro A, Mestre T, Carneiro P, Sahumbaiev I, Seruca R, Sanches JM. 2017.  
465 Blue intensity matters for cell cycle profiling in fluorescence DAPI-stained  
466 images. Lab Invest 97:615-625.
- 467 25. Walters AD, Amoateng K, Wang R, Chen J-H, McDermott G, Larabell CA, Gadal  
468 O, Cohen-Fix O. 2019. Nuclear envelope expansion in budding yeast is  
469 independent of cell growth and does not determine nuclear volume. Mol Biol  
470 Cell 30:131-145.
- 471 26. Richa S, Dey P, Park C, Yang J, Son JY, Park JH, Lee SH, Ahn M-Y, Kim IS, Moon  
472 HR. 2020. A new histone deacetylase inhibitor, MHY4381, induces apoptosis  
473 via generation of reactive oxygen species in human prostate cancer cells.  
474 Biomol Ther (Seoul) 28:184.
- 475 27. Grewal C, Hickmott J, Rentas S, Karagiannis J. 2012. A conserved histone  
476 deacetylase with a role in the regulation of cytokinesis in  
477 *Schizosaccharomyces pombe*. Cell Div 7:1-14.
- 478 28. Newcomb R, McRae J, Ingram J, Elborough K, Jaeger SR. 2010. Genetic  
479 variation in taste and odour perception: An emerging science to guide new

- 480 product development, p 570-596, Consumer-Driven Innovation in Food and  
481 Personal Care Products doi:10.1533/9781845699970.5.570.
- 482 29. Anonymous. Diagnostic Key Classes of Off-Character Compounds Esters.  
483 [https://wineserver.ucdavis.edu/industry-info/enology/fermentation-](https://wineserver.ucdavis.edu/industry-info/enology/fermentation-management-guides/key-diagnosing-problem-fermentations/diagnostic-key-classes-character-compounds-esters)  
484 [management-guides/key-diagnosing-problem-fermentations/diagnostic-key-](https://wineserver.ucdavis.edu/industry-info/enology/fermentation-management-guides/key-diagnosing-problem-fermentations/diagnostic-key-classes-character-compounds-esters)  
485 [classes-character-compounds-esters](https://wineserver.ucdavis.edu/industry-info/enology/fermentation-management-guides/key-diagnosing-problem-fermentations/diagnostic-key-classes-character-compounds-esters). Accessed 28/07/2022.
- 486 30. Christman JK. 2002. 5-Azacytidine and 5-aza-2'-deoxycytidine as inhibitors of  
487 DNA methylation: Mechanistic studies and their implications for cancer  
488 therapy. *Oncogene* 21:5483-5495.
- 489 31. Yamashita YI, Shimada M, Harimoto N, Rikimaru T, Shirabe K, Tanaka S,  
490 Sugimachi K. 2003. Histone deacetylase inhibitor trichostatin a induces cell-  
491 cycle arrest/apoptosis and hepatocyte differentiation in human hepatoma  
492 cells. *Int J Cancer* 103:572-576.
- 493 32. Merkwirth C, Jovaisaite V, Durieux J, Matilainen O, Jordan SD, Quiros PM,  
494 Steffen KK, Williams EG, Mouchiroud L, Tronnes SU. 2016. Two conserved  
495 histone demethylases regulate mitochondrial stress-induced longevity. *Cell*  
496 165:1209-1223.
- 497 33. Steffen KK, MacKay VL, Kerr EO, Tsuchiya M, Hu D, Fox LA, Dang N, Johnston  
498 ED, Oakes JA, Tchao BN. 2008. Yeast life span extension by depletion of 60s  
499 ribosomal subunits is mediated by Gcn4. *Cell* 133:292-302.
- 500 34. Mittal N, Guimaraes JC, Gross T, Schmidt A, Vina-Vilaseca A, Nedialkova DD,  
501 Aeschmann F, Leidel SA, Spang A, Zavolan M. 2017. The Gcn4 transcription

502 factor reduces protein synthesis capacity and extends yeast lifespan. Nature

503 communications 8:1-12.

504



505 **Figures and Tables:**

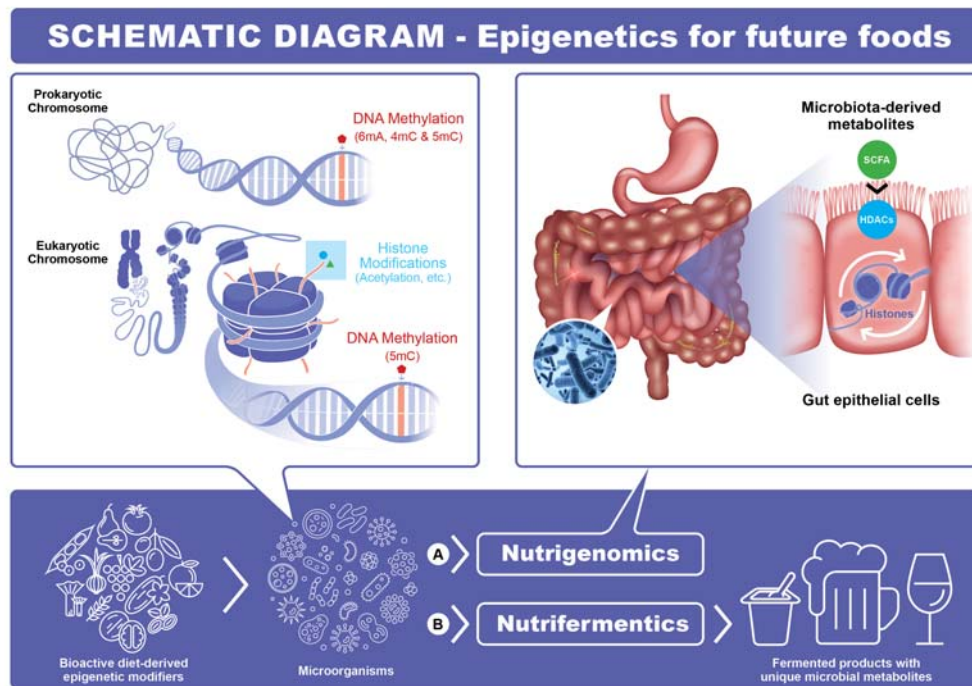

506  
507 **Figure 1.** Schematic diagram: An innovation to food fermentation by impacting gene  
508 expression levels of microbial starters using diet-derived epigenetic modifiers.

509 A) **Nutrigenomics:** A well-established field of research investigating the effect of  
510 food and food components on gene expression, and its role involved in the  
511 interaction between host/microbes and the nutritional environment;

512 B) **Nutrifermentics:** A new research direction firstly proposed in this study,  
513 which provides insights regarding the effect of food and food components on  
514 microbial starters and its potential application in fermentation.

515 **Abbreviations:** SCFA: short-chain fatty acids; HDACs: histone deacetylases.

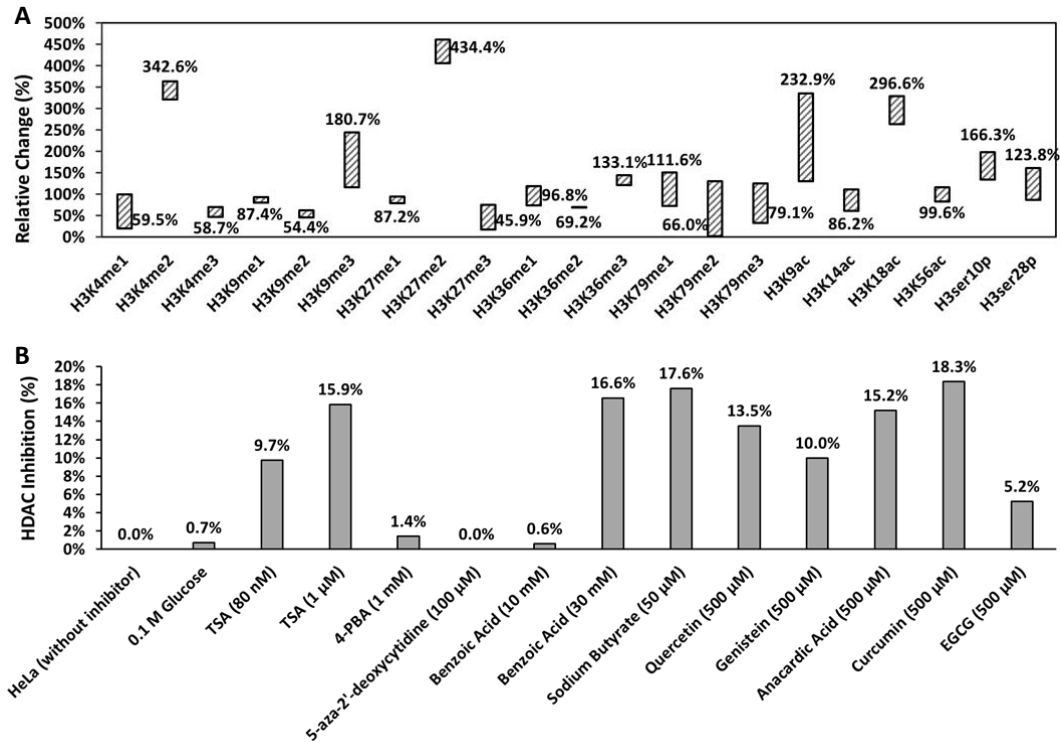

516

517

**Figure 2. A.** Relative changes of 21 histone H3 modification patterns between *S.*

518

*cerevisiae* wild type and strains treated with 5 mM benzoic acid. **B.** Histone

519

deacetylase (HDAC) inhibition capacity of candidate epigenetic modifiers at different

520

concentrations, in comparison with HeLa cells without inhibitors.

521

**Abbreviations:** TSA: trichostatin A; 4-PBA: 4-phenylbutyric acid; EGCG: epigallocatechin

522

gallate.

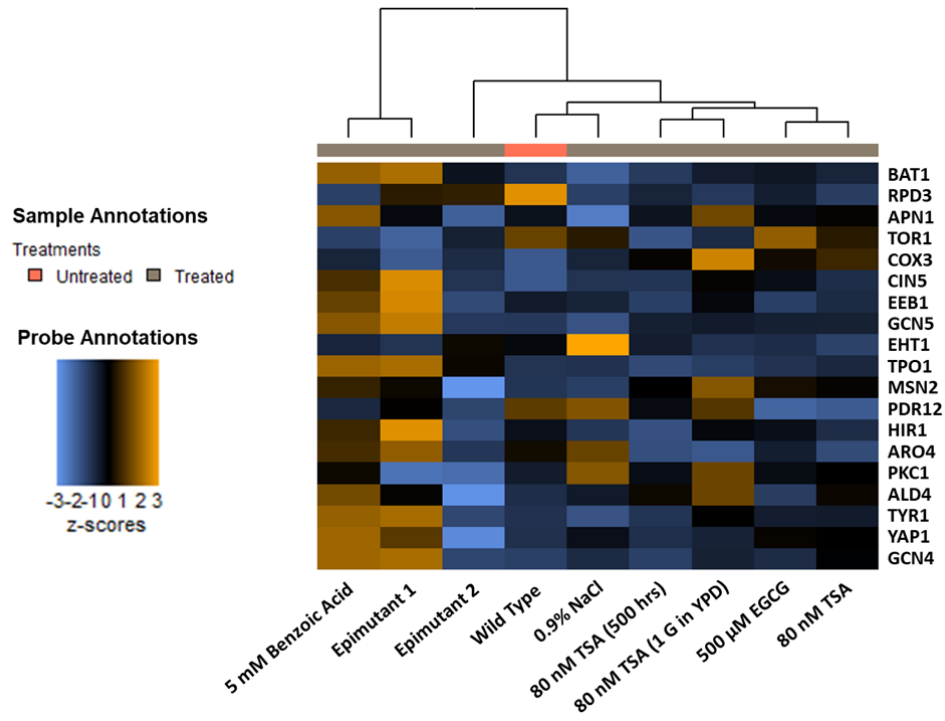

523

524 **Figure 3.** Heat map showing unsupervised hierarchical clustering of 9 *S. cerevisiae*  
525 samples under different treatments, based on their expression levels of 19 selected  
526 genes.

527 **Abbreviations:** TSA: trichostatin A; EGCG: epigallocatechin gallate.

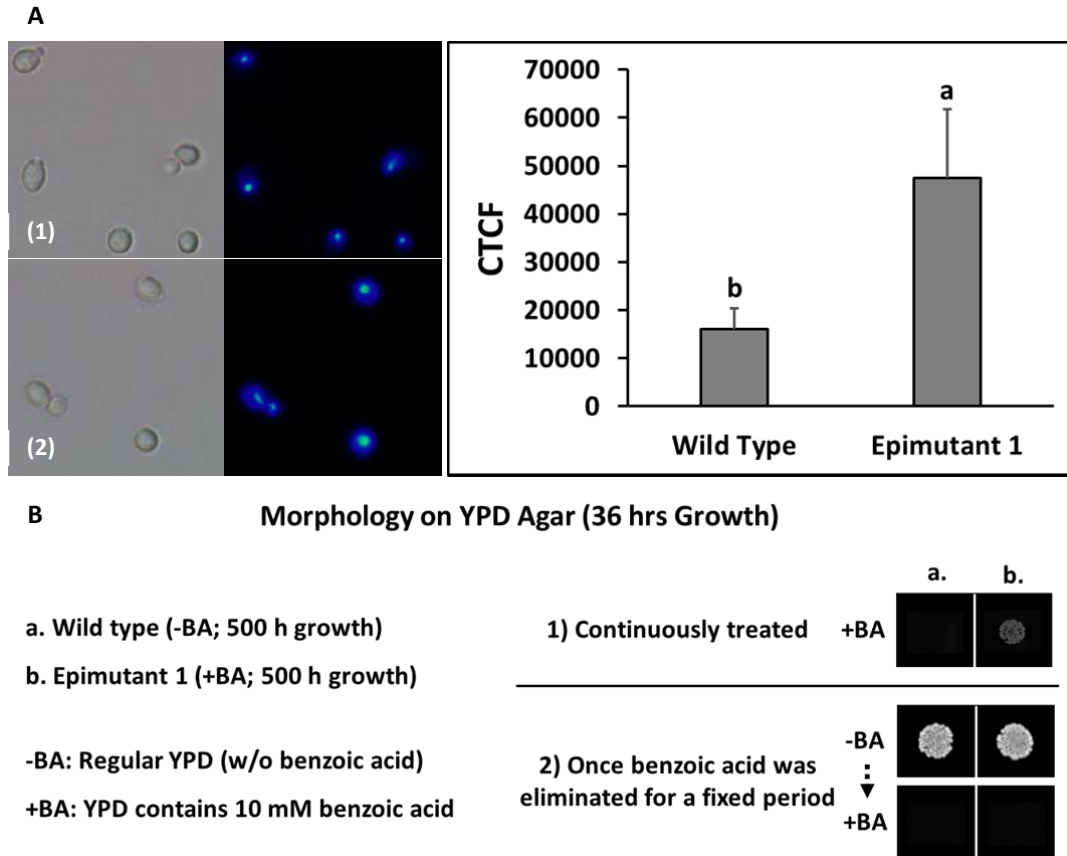

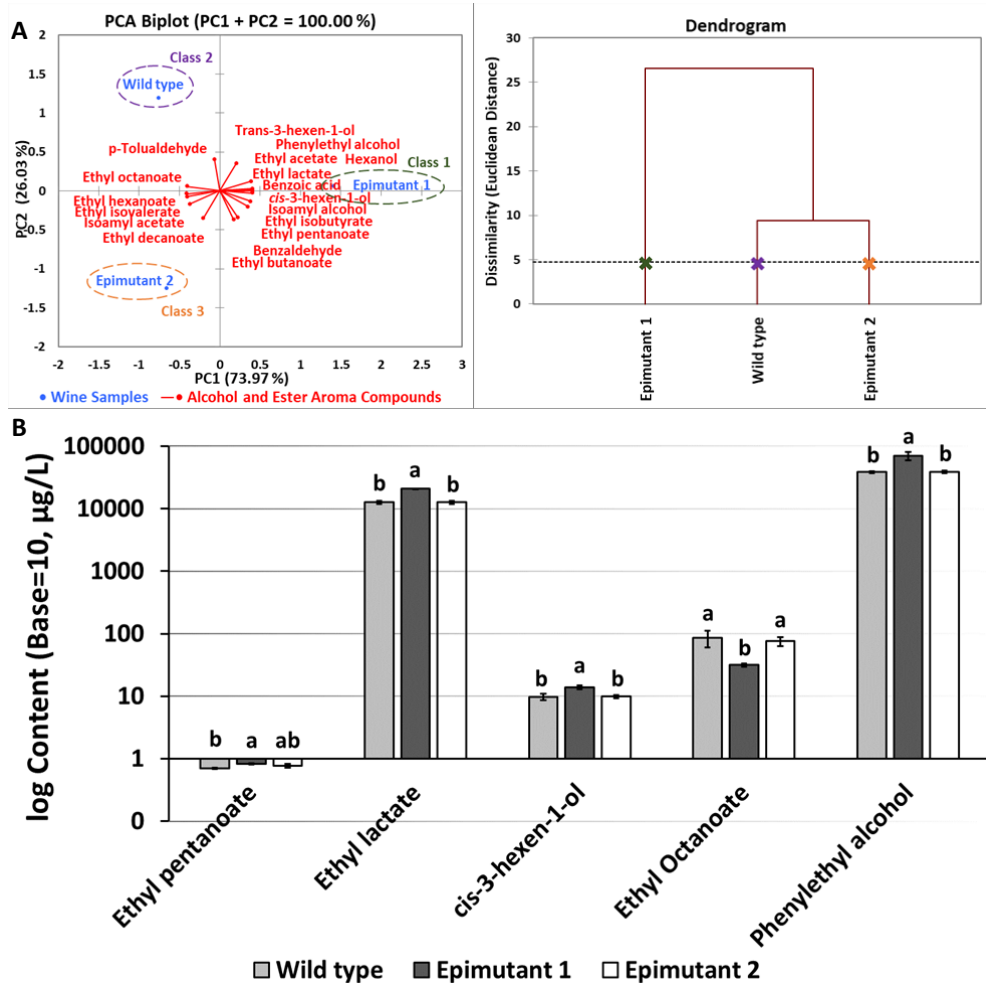

535

536 **Figure 5. A. Left:** Principal component analysis (PCA) bi-plot illustrating the  
 537 relationship between wine samples fermented under different conditions and the  
 538 variance of alcohol and ester aroma compounds; **Right:** Wine samples grouped using  
 539 agglomerative hierarchical clustering (HCA) according to dissimilarity levels based on  
 540 GC-MS analysis. **B.** The content of ester and higher alcohol compounds potentially  
 541 contributing to distinct aromatic profiles of wine samples fermented by epimutated  
 542 *S. cerevisiae*.

543 **a-b:** different letters indicate significant difference based on Tukey pairwise mean  
 544 comparison results ( $p < 0.05$ ).

545

**Table 1.** Analysis of alcohol and ester aroma compounds detected in Pinot Noir wine.

| Wine Samples* | Ethyl Acetate (mg/L)     | Ethyl Isobutyrate (µg/L) | Ethyl butanoate (µg/L)  | Ethyl Isovalerate (µg/L) | Isoamyl Acetate (µg/L)    | Ethyl pentanoate (µg/L) | Isoamyl alcohol (mg/L)    | Ethyl hexanoate (µg/L)   | Ethyl lactate (mg/L)    |
|---------------|--------------------------|--------------------------|-------------------------|--------------------------|---------------------------|-------------------------|---------------------------|--------------------------|-------------------------|
| Wild Type     | 27.5 ± 0.5 <sup>ab</sup> | 43.8 ± 4.4 <sup>a</sup>  | 64.5 ± 9.0 <sup>a</sup> | 4.1 ± 0.5 <sup>a</sup>   | 165.7 ± 24.9 <sup>a</sup> | 0.7 ± 0.0 <sup>b</sup>  | 143.7 ± 6.1 <sup>a</sup>  | 75.0 ± 16.4 <sup>a</sup> | 12.6 ± 0.6 <sup>b</sup> |
| Epimutant 1   | 30.9 ± 1.9 <sup>a</sup>  | 51.6 ± 4.0 <sup>a</sup>  | 66.9 ± 4.9 <sup>a</sup> | 3.3 ± 0.7 <sup>a</sup>   | 151.3 ± 20.7 <sup>a</sup> | 0.8 ± 0.0 <sup>a</sup>  | 175.2 ± 23.7 <sup>a</sup> | 54.0 ± 9.5 <sup>a</sup>  | 20.8 ± 0.3 <sup>a</sup> |
| Epimutant 2   | 26.2 ± 2.1 <sup>b</sup>  | 46.8 ± 2.5 <sup>a</sup>  | 67.3 ± 5.6 <sup>a</sup> | 4.3 ± 0.3 <sup>a</sup>   | 174.5 ± 19.1 <sup>a</sup> | 0.8 ± 0.1 <sup>ab</sup> | 147.6 ± 4.4 <sup>a</sup>  | 76.2 ± 2.5 <sup>a</sup>  | 12.6 ± 0.7 <sup>b</sup> |

  

| Wine Samples* | Hexanol (µg/L)            | Trans-3-hexen-1-ol (µg/L) | Cis-3-hexen-1-ol (µg/L) | Ethyl Octanoate (µg/L)   | Benzaldehyde (µg/L)      | Ethyl decanoate (µg/L)  | Phenylethyl alcohol (mg/L) | p-Tolualdehyde (µg/L)     | Benzoic Acid (mg/L)    |
|---------------|---------------------------|---------------------------|-------------------------|--------------------------|--------------------------|-------------------------|----------------------------|---------------------------|------------------------|
| Wild Type     | 605.7 ± 14.1 <sup>a</sup> | 54.4 ± 10.4 <sup>a</sup>  | 9.7 ± 1.2 <sup>b</sup>  | 86.1 ± 25.6 <sup>a</sup> | 35.5 ± 11.3 <sup>a</sup> | 20.2 ± 4.0 <sup>a</sup> | 38.4 ± 1.4 <sup>b</sup>    | 159.6 ± 21.1 <sup>a</sup> | 2.4 ± 0.1 <sup>b</sup> |
| Epimutant 1   | 694.1 ± 24.8 <sup>a</sup> | 56.4 ± 7.8 <sup>a</sup>   | 13.8 ± 0.9 <sup>a</sup> | 31.6 ± 1.7 <sup>b</sup>  | 45.3 ± 11.7 <sup>a</sup> | 20.0 ± 2.2 <sup>a</sup> | 69.9 ± 10.6 <sup>a</sup>   | 146.1 ± 13.6 <sup>a</sup> | 3.3 ± 0.1 <sup>a</sup> |
| Epimutant 2   | 608.1 ± 65.1 <sup>a</sup> | 21.3 ± 11.0 <sup>b</sup>  | 9.9 ± 0.6 <sup>b</sup>  | 75.4 ± 12.1 <sup>a</sup> | 45.2 ± 12.2 <sup>a</sup> | 24.4 ± 6.0 <sup>a</sup> | 38.8 ± 1.9 <sup>b</sup>    | 137.1 ± 13.0 <sup>a</sup> | 2.3 ± 0.1 <sup>b</sup> |

546 **Note:** Results are presented as mean ± SD (standard deviation, N = 3); <sup>a-b</sup> Results with different superscripts within the same column indicate significant  
 547 differences between three types of wines (Tukey's HSD test, *p* < 0.05); \*Wine samples were fermented using three types of the starters: **Wild Type:** 500 h  
 548 growth in regular YPD broth, 20 h/sub-culture; **Epimutant 1:** 500 h growth in YPD broth containing 10 mM benzoic acid, 20 h/sub-culture; **Epimutant 2:** 500  
 549 h growth in YPD broth containing 10 mM benzoic acid, followed by 20 h growth in regular YPD broth w/o stress, 20 h/sub-culture.
